# Supplementary material
Source: PubMed Central journal article supplement (PMC4542247)
Supplement: AEM.01753-15_zam999116556so1.pdf [file AEM.01753-15_zam999116556so1.pdf]

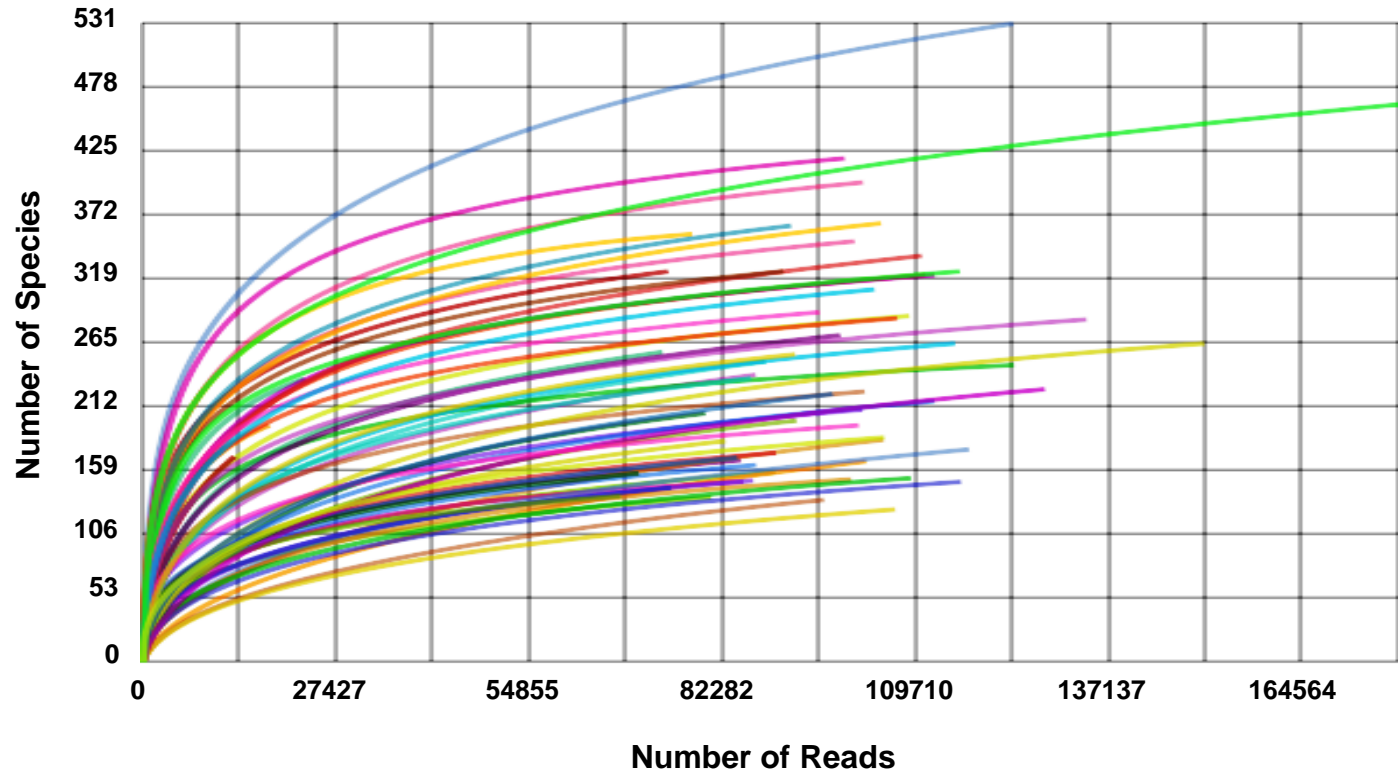

**Figure S1.** Rarefaction curves of the species number for 60 uterine swabs.

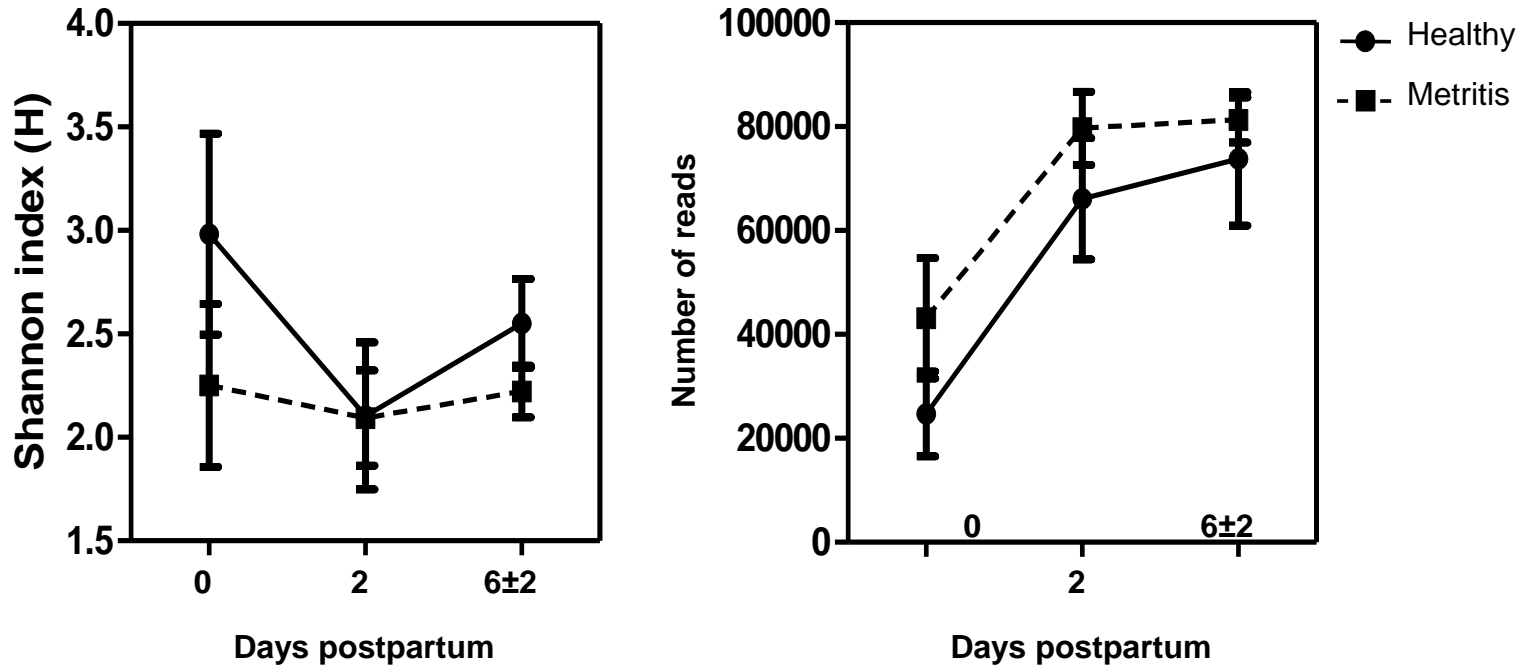

**Figure S2.** Diversity and abundance. The Shannon index (left) and number of reads (right) are plotted in the healthy (solid line) and metritic (dotted line) cows across the time. Data are presented by mean  $\pm$  SEM. There is no significant difference between the healthy and metritic cows.

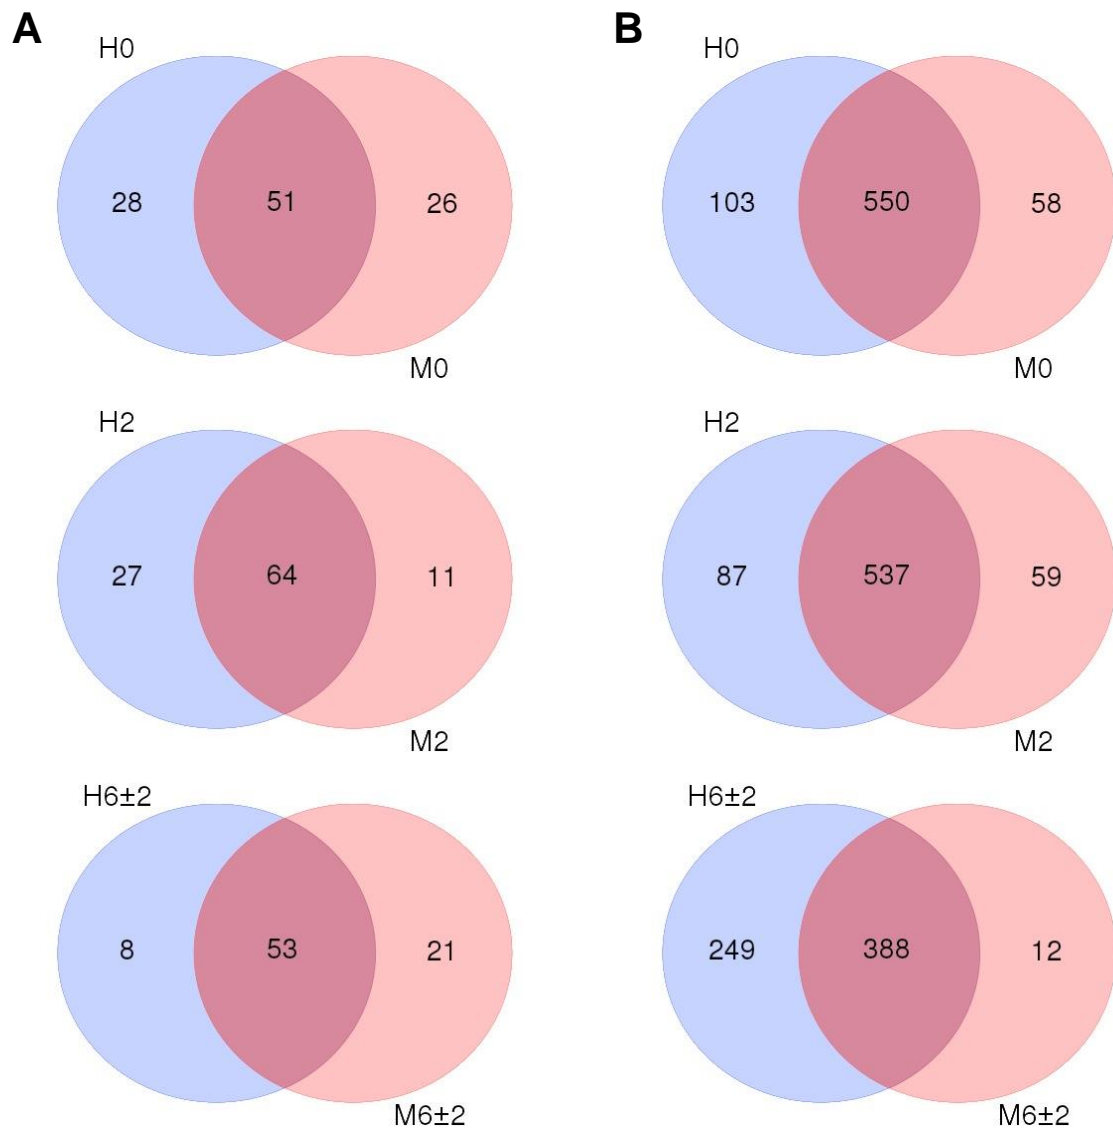

**Figure S3.** Venn diagrams. Venn diagrams show core genera shared by all of the dairy cows within each health status group (A), and genera that were found in any of the dairy cows within each group (B). Shared and unique genera between healthy (H) and metritic (M) cows are shown at calving (0), 2, and 6±2 days postpartum.

**Table S1.** MG-RAST IDs.

**Healthy**

| Days postpartum | ID      |
|-----------------|---------|
| 0               | 4566115 |
| 0               | 4566138 |
| 0               | 4566163 |
| 0               | 4566147 |
| 0               | 4566112 |
| 0               | 4566141 |
| 0               | 4566137 |
| 0               | 4566122 |
| 2               | 4566171 |
| 2               | 4566113 |
| 2               | 4566149 |
| 2               | 4566144 |
| 2               | 4566142 |
| 2               | 4566139 |
| 2               | 4566116 |
| 2               | 4566133 |
| 2               | 4566145 |
| 4               | 4566154 |
| 4               | 4566136 |
| 6               | 4566172 |
| 6               | 4566148 |
| 6               | 4566140 |
| 6               | 4566117 |
| 8               | 4566150 |
| 8               | 4566146 |
| 8               | 4566143 |
| 8               | 4566135 |
| 8               | 4566114 |
| Total           | N = 28  |

**Metritis**

| Days postpartum | ID      |
|-----------------|---------|
| 0               | 4566118 |
| 0               | 4566121 |
| 0               | 4566125 |
| 0               | 4566128 |
| 0               | 4566131 |
| 0               | 4566151 |
| 0               | 4566158 |
| 0               | 4566155 |
| 0               | 4566168 |
| 2               | 4566152 |
| 2               | 4566123 |
| 2               | 4566126 |
| 2               | 4566129 |
| 2               | 4566132 |
| 2               | 4566119 |
| 2               | 4566156 |
| 2               | 4566159 |
| 2               | 4566161 |
| 2               | 4566164 |
| 2               | 4566166 |
| 2               | 4566169 |
| 4               | 4566153 |
| 4               | 4566124 |
| 6               | 4566170 |
| 6               | 4566160 |
| 6               | 4566134 |
| 6               | 4566127 |
| 8               | 4566167 |
| 8               | 4566165 |
| 8               | 4566162 |
| 8               | 4566130 |
| 8               | 4566120 |
| Total           | N = 32  |

**Table S2.** Distribution of the 30 most abundant genera isolated from the uteri of healthy and metritic dairy cows at 0, 2, and 6 ± 2 days post parturition (DPP).

| Genus                              | All  | Healthy (%) |       |         | Metritis (%) |       |         |
|------------------------------------|------|-------------|-------|---------|--------------|-------|---------|
|                                    |      | 0 DPP       | 2 DPP | 6±2 DPP | 0 DPP        | 2 DPP | 6±2 DPP |
| <i>Fusobacterium</i>               | 15.7 | 5.2         | 16.1  | 15.7    | 8.6          | 20.4  | 23.4    |
| <i>Bacteroides</i>                 | 13.9 | 8.6         | 5.0   | 12.5    | 14.3         | 12.1  | 28.3    |
| <i>Coxiella</i>                    | 12.7 | 39.6        | 1.0   | 0.1     | 43.2         | 3.6   | 0.1     |
| <i>Porphyromonas</i>               | 9.9  | 11.4        | 5.5   | 9.6     | 9.2          | 4.1   | 19.7    |
| <i>Ureaplasma</i>                  | 5.2  | 0.1         | 19.0  | 6.2     | 0.03         | 5.8   | 0.1     |
| <i>Sneathia</i>                    | 4.7  | 0.3         | 8.8   | 8.7     | 0.5          | 7.3   | 1.4     |
| <i>Mycoplasma</i>                  | 4.6  | 0.9         | 5.7   | 2.9     | 0.5          | 13.3  | 1.8     |
| <i>Gallibacterium</i>              | 3.2  | 0.2         | 12.5  | 1.4     | 0.2          | 4.3   | 0.8     |
| <i>Helcococcus</i>                 | 3.0  | 0.7         | 1.1   | 4.2     | 1.5          | 1.1   | 8.2     |
| <i>Prevotella</i>                  | 2.9  | 1.8         | 1.5   | 3.2     | 2.2          | 3.2   | 4.8     |
| <i>Streptococcus</i>               | 2.5  | 1.0         | 3.3   | 2.0     | 1.8          | 5.8   | 0.5     |
| <i>Escherichia</i>                 | 2.1  | 0.6         | 0.1   | 6.4     | 0.03         | 3.9   | 0.03    |
| <i>Ruminococcus</i>                | 1.9  | 2.9         | 2.0   | 2.5     | 2.5          | 1.7   | 0.1     |
| <i>Blautia</i>                     | 1.1  | 1.2         | 1.5   | 1.6     | 1.0          | 1.4   | 0.1     |
| <i>Acholeplasma</i>                | 1.0  | 1.0         | 2.4   | 1.7     | 0.6          | 0.6   | 0.2     |
| <i>Clostridium</i>                 | 1.0  | 1.3         | 1.0   | 1.2     | 1.2          | 0.8   | 0.5     |
| <i>Filifactor</i>                  | 0.9  | 0.9         | 0.6   | 0.9     | 0.7          | 0.7   | 1.7     |
| <i>Peptoniphilus</i>               | 0.9  | 1.1         | 0.6   | 1.3     | 0.6          | 0.5   | 1.1     |
| <i>Pedobacter</i>                  | 0.8  | 1.7         | 0.6   | 0.8     | 1.3          | 0.6   | 0.1     |
| <i>Serratia</i>                    | 0.7  | 0.2         | 0.1   | 2.0     | 0.02         | 1.3   | 0.01    |
| <i>Campylobacter</i>               | 0.6  | 0.2         | 0.1   | 2.1     | 0.1          | 0.1   | 0.9     |
| <i>Candidatus Blochmannia</i>      | 0.6  | 0.9         | 0.8   | 0.6     | 0.4          | 0.5   | 0.4     |
| <i>Treponema</i>                   | 0.5  | 0.3         | 0.4   | 1.4     | 0.2          | 0.4   | 0.4     |
| <i>Oscillospira</i>                | 0.4  | 0.8         | 0.4   | 0.4     | 0.8          | 0.3   | 0.02    |
| <i>Caloramator</i>                 | 0.4  | 0.7         | 0.2   | 0.6     | 0.5          | 0.3   | 0.1     |
| <i>Pasteurella</i>                 | 0.4  | 0.05        | 0.6   | 1.3     | 0.03         | 0.03  | 0.1     |
| <i>Arcanobacterium/Trueperella</i> | 0.3  | 0.02        | 0.03  | 0.2     | 0.3          | 0.2   | 1.0     |
| <i>Peptostreptococcus</i>          | 0.3  | 0.4         | 0.3   | 0.3     | 0.3          | 0.2   | 0.5     |
| <i>Mannheimia</i>                  | 0.3  | 0.004       | 1.1   | 0.1     | 0.005        | 0.5   | 0.002   |
| <i>Bifidobacterium</i>             | 0.2  | 0.3         | 0.7   | 0.3     | 0.03         | 0.1   | 0.03    |

**Table S3.** Correlations among the 30 most abundant genera and uterine discharge score at 6 ± 2 days post parturition (DPP).

| Genera <sup>1</sup>                | UDS   | <i>Fusobacterium</i> | <i>Bacteroides</i> | <i>Coxiella</i> | <i>Porphyromonas</i> | <i>Ureaplasma</i> | <i>Sneathia</i> | <i>Mycoplasma</i> | <i>Gallibacterium</i> | <i>Helcococcus</i> | <i>Prevotella</i> | <i>Streptococcus</i> | <i>Escherichia</i> | <i>Ruminococcus</i> | <i>Blautia</i> | <i>Acholeplasma</i> | <i>Clostridium</i> | <i>Filifactor</i> | <i>Peptoniphilus</i> | <i>Pedobacter</i> | <i>Serratia</i> | <i>Campylobacter</i> | <i>Candidatus Blochmannia</i> | <i>Treponema</i> | <i>Oscillospira</i> | <i>Caloramator</i> | <i>Pasteurella</i> | <i>Arcanobacterium/Trueperella</i> | <i>Peptostreptococcus</i> | <i>Mannheimia</i> | <i>Bifidobacterium</i> |   |   |   |   |  |
|------------------------------------|-------|----------------------|--------------------|-----------------|----------------------|-------------------|-----------------|-------------------|-----------------------|--------------------|-------------------|----------------------|--------------------|---------------------|----------------|---------------------|--------------------|-------------------|----------------------|-------------------|-----------------|----------------------|-------------------------------|------------------|---------------------|--------------------|--------------------|------------------------------------|---------------------------|-------------------|------------------------|---|---|---|---|--|
| UDS                                | 1     |                      |                    |                 |                      |                   |                 |                   |                       |                    |                   |                      |                    |                     |                |                     |                    |                   |                      |                   |                 |                      |                               |                  |                     |                    |                    |                                    |                           |                   |                        |   |   |   |   |  |
| <i>Fusobacterium</i>               | 0.49  | 1                    |                    |                 |                      |                   |                 |                   |                       |                    |                   |                      |                    |                     |                |                     |                    |                   |                      |                   |                 |                      |                               |                  |                     |                    |                    |                                    |                           |                   |                        |   |   |   |   |  |
| <i>Bacteroides</i>                 | 0.51  | 0.51                 | 1                  |                 |                      |                   |                 |                   |                       |                    |                   |                      |                    |                     |                |                     |                    |                   |                      |                   |                 |                      |                               |                  |                     |                    |                    |                                    |                           |                   |                        |   |   |   |   |  |
| <i>Coxiella</i>                    | .     | .                    | .                  | 1               |                      |                   |                 |                   |                       |                    |                   |                      |                    |                     |                |                     |                    |                   |                      |                   |                 |                      |                               |                  |                     |                    |                    |                                    |                           |                   |                        |   |   |   |   |  |
| <i>Porphyromonas</i>               | .     | .                    | .                  | .               | 1                    |                   |                 |                   |                       |                    |                   |                      |                    |                     |                |                     |                    |                   |                      |                   |                 |                      |                               |                  |                     |                    |                    |                                    |                           |                   |                        |   |   |   |   |  |
| <i>Ureaplasma</i>                  | .     | .                    | .                  | 0.51            | -0.53                | 1                 |                 |                   |                       |                    |                   |                      |                    |                     |                |                     |                    |                   |                      |                   |                 |                      |                               |                  |                     |                    |                    |                                    |                           |                   |                        |   |   |   |   |  |
| <i>Sneathia</i>                    | -0.43 | .                    | .                  | .               | .                    | .                 | 1               |                   |                       |                    |                   |                      |                    |                     |                |                     |                    |                   |                      |                   |                 |                      |                               |                  |                     |                    |                    |                                    |                           |                   |                        |   |   |   |   |  |
| <i>Mycoplasma</i>                  | -0.43 | .                    | .                  | .               | -0.62                | 0.47              | .               | 1                 |                       |                    |                   |                      |                    |                     |                |                     |                    |                   |                      |                   |                 |                      |                               |                  |                     |                    |                    |                                    |                           |                   |                        |   |   |   |   |  |
| <i>Gallibacterium</i>              | .     | .                    | .                  | .               | .                    | .                 | 0.44            | .                 | 1                     |                    |                   |                      |                    |                     |                |                     |                    |                   |                      |                   |                 |                      |                               |                  |                     |                    |                    |                                    |                           |                   |                        |   |   |   |   |  |
| <i>Helcococcus</i>                 | 0.42  | 0.51                 | .                  | .               | .                    | .                 | .               | .                 | .                     | 1                  |                   |                      |                    |                     |                |                     |                    |                   |                      |                   |                 |                      |                               |                  |                     |                    |                    |                                    |                           |                   |                        |   |   |   |   |  |
| <i>Prevotella</i>                  | .     | .                    | .                  | .               | 0.63                 | .                 | .               | .                 | .                     | .                  | 1                 |                      |                    |                     |                |                     |                    |                   |                      |                   |                 |                      |                               |                  |                     |                    |                    |                                    |                           |                   |                        |   |   |   |   |  |
| <i>Streptococcus</i>               | .     | .                    | .                  | 0.42            | .                    | .                 | .               | .                 | .                     | .                  | .                 | 1                    |                    |                     |                |                     |                    |                   |                      |                   |                 |                      |                               |                  |                     |                    |                    |                                    |                           |                   |                        |   |   |   |   |  |
| <i>Escherichia</i>                 | -0.54 | .                    | -0.52              | .               | .                    | .                 | .               | .                 | .                     | .                  | .                 | 0.49                 | 1                  |                     |                |                     |                    |                   |                      |                   |                 |                      |                               |                  |                     |                    |                    |                                    |                           |                   |                        |   |   |   |   |  |
| <i>Ruminococcus</i>                | .     | -0.56                | -0.62              | .               | .                    | 0.60              | .               | .                 | .                     | .                  | .                 | .                    | 0.50               | 1                   |                |                     |                    |                   |                      |                   |                 |                      |                               |                  |                     |                    |                    |                                    |                           |                   |                        |   |   |   |   |  |
| <i>Blautia</i>                     | .     | -0.55                | .                  | .               | .                    | .                 | .               | .                 | .                     | .                  | .                 | .                    | .                  | 0.51                | 1              |                     |                    |                   |                      |                   |                 |                      |                               |                  |                     |                    |                    |                                    |                           |                   |                        |   |   |   |   |  |
| <i>Acholeplasma</i>                | .     | .                    | .                  | .               | .                    | .                 | 0.47            | .                 | 0.45                  | .                  | .                 | .                    | .                  | .                   | .              | 1                   |                    |                   |                      |                   |                 |                      |                               |                  |                     |                    |                    |                                    |                           |                   |                        |   |   |   |   |  |
| <i>Clostridium</i>                 | .     | -0.63                | -0.48              | .               | .                    | .                 | .               | .                 | .                     | .                  | .                 | .                    | .                  | 0.51                | 0.63           | .                   | 1                  |                   |                      |                   |                 |                      |                               |                  |                     |                    |                    |                                    |                           |                   |                        |   |   |   |   |  |
| <i>Filifactor</i>                  | .     | .                    | 0.46               | .               | 0.66                 | .                 | .               | -0.59             | .                     | .                  | .                 | .                    | .                  | .                   | -0.47          | .                   | .                  | 1                 |                      |                   |                 |                      |                               |                  |                     |                    |                    |                                    |                           |                   |                        |   |   |   |   |  |
| <i>Peptoniphilus</i>               | .     | .                    | .                  | .               | 0.53                 | .                 | .               | .                 | .                     | .                  | 0.53              | .                    | .                  | .                   | .              | .                   | .                  | 0.54              | 1                    |                   |                 |                      |                               |                  |                     |                    |                    |                                    |                           |                   |                        |   |   |   |   |  |
| <i>Pedobacter</i>                  | -0.47 | -0.49                | .                  | .               | .                    | 0.47              | .               | .                 | .                     | -0.56              | .                 | .                    | .                  | 0.69                | 0.57           | 0.46                | .                  | .                 | .                    | 1                 |                 |                      |                               |                  |                     |                    |                    |                                    |                           |                   |                        |   |   |   |   |  |
| <i>Serratia</i>                    | -0.48 | .                    | -0.52              | .               | .                    | .                 | .               | .                 | .                     | .                  | .                 | 0.42                 | .                  | 0.53                | .              | .                   | .                  | .                 | .                    | .                 | 1               |                      |                               |                  |                     |                    |                    |                                    |                           |                   |                        |   |   |   |   |  |
| <i>Campylobacter</i>               | .     | .                    | .                  | .               | .                    | .                 | .               | .                 | .                     | .                  | .                 | 0.47                 | .                  | .                   | .              | .                   | .                  | 0.49              | .                    | .                 | .               | 1                    |                               |                  |                     |                    |                    |                                    |                           |                   |                        |   |   |   |   |  |
| <i>Candidatus Blochmannia</i>      | -0.44 | .                    | .                  | .               | .                    | 0.51              | 0.56            | .                 | .                     | .                  | 0.46              | .                    | .                  | .                   | .              | 0.49                | 0.47               | .                 | .                    | 0.61              | .               | .                    | 1                             |                  |                     |                    |                    |                                    |                           |                   |                        |   |   |   |   |  |
| <i>Treponema</i>                   | -0.49 | .                    | -0.59              | .               | .                    | .                 | .               | 0.42              | .                     | .                  | .                 | 0.52                 | 0.55               | .                   | 0.54           | .                   | .                  | .                 | 0.54                 | 0.52              | .               | .                    | .                             | 1                |                     |                    |                    |                                    |                           |                   |                        |   |   |   |   |  |
| <i>Oscillospira</i>                | -0.48 | -0.50                | .                  | .               | -0.50                | 0.45              | .               | .                 | .                     | .                  | .                 | .                    | 0.42               | 0.73                | .              | .                   | 0.53               | -0.45             | .                    | 0.51              | 0.43            | .                    | .                             | .                | 1                   |                    |                    |                                    |                           |                   |                        |   |   |   |   |  |
| <i>Caloramator</i>                 | .     | -0.55                | -0.59              | .               | .                    | .                 | .               | .                 | .                     | .                  | .                 | .                    | .                  | 0.59                | 0.54           | .                   | 0.47               | .                 | .                    | .                 | .               | .                    | .                             | .                | 0.65                | 0.69               | 1                  |                                    |                           |                   |                        |   |   |   |   |  |
| <i>Pasteurella</i>                 | -0.43 | .                    | -0.43              | 0.43            | -0.44                | 0.48              | .               | .                 | .                     | .                  | -0.52             | .                    | .                  | 0.66                | .              | .                   | .                  | .                 | .                    | 0.45              | .               | .                    | .                             | 0.67             | 0.54                | .                  | 1                  |                                    |                           |                   |                        |   |   |   |   |  |
| <i>Arcanobacterium/Trueperella</i> | .     | .                    | .                  | .               | .                    | .                 | .               | .                 | -0.47                 | .                  | .                 | .                    | .                  | .                   | -0.70          | .                   | .                  | .                 | .                    | .                 | .               | .                    | .                             | .                | .                   | -0.53              | -0.45              | .                                  | 1                         |                   |                        |   |   |   |   |  |
| <i>Peptostreptococcus</i>          | .     | .                    | .                  | .               | 0.57                 | .                 | .               | .                 | .                     | .                  | 0.43              | .                    | .                  | .                   | .              | .                   | .                  | 0.46              | .                    | .                 | .               | .                    | .                             | .                | .                   | .                  | .                  | .                                  | .                         | .                 | .                      | . | . | 1 |   |  |
| <i>Mannheimia</i>                  | -0.63 | .                    | .                  | .               | .                    | .                 | 0.58            | .                 | .                     | .                  | .                 | .                    | .                  | .                   | .              | .                   | .                  | .                 | .                    | 0.58              | .               | .                    | 0.65                          | 0.61             | .                   | .                  | .                  | 0.56                               | .                         | .                 | .                      | . | . | 1 |   |  |
| <i>Bifidobacterium</i>             | .     | .                    | .                  | 0.45            | -0.52                | 0.52              | .               | .                 | .                     | .                  | .                 | .                    | .                  | .                   | .              | .                   | .                  | .                 | .                    | 0.51              | .               | .                    | 0.44                          | .                | .                   | .                  | .                  | .                                  | .                         | .                 | .                      | . | . | . | 1 |  |

<sup>1</sup>except UDS; UDS = uterine discharge score (1 = not fetid normal lochia, viscous, clear, red, or brown; 2 = cloudy mucoid discharge with flecks of pus; 3 = not fetid mucopurulent discharge with ≤ 50% pus; 4 = not fetid mucopurulent discharge with ≥ 50% pus; 5 = fetid red-brownish, watery discharge). Only significant ( $P \leq 0.05$ ) Spearman  $r_s$  coefficients of correlation are presented.

**Table S4.** Results for discriminant analysis performed using the 25 most abundant genera in the uteri at 0, 2, and 6 ± 2 DPP.

| Item               | Eigenvalue <sup>a</sup> | Canonical correlation <sup>b</sup> | R <sup>2,c</sup> | Number misclassified <sup>d</sup> | Wilks' Lambda | <i>P</i> |
|--------------------|-------------------------|------------------------------------|------------------|-----------------------------------|---------------|----------|
| 0 DPP <sup>e</sup> | 21.7                    | 0.98                               | 0.96             | 0                                 | 0.04          | < 0.001  |
| 2 DPP              | 23.8                    | 0.98                               | 0.96             | 0                                 | 0.04          | < 0.001  |
| 6 ± 2 DPP          | 21.3                    | 0.98                               | 0.96             | 0                                 | 0.04          | < 0.001  |

<sup>a</sup>First canonical (canonical 1) discriminant functions were used in the analysis.

<sup>b</sup>Multiple correlation between the predictors (microbial genera) and the discriminant function.

<sup>c</sup>Canonical correlation squared. Proportion of variation in group assignment explained by the model.

<sup>d</sup>Number of cows incorrectly classified into a healthy or metritic group.

<sup>e</sup>DPP = days postpartum. 0 DPP = calving.

**Table S5.** Distribution of the 30 most abundant species plus *Trueperella pyogenes* (the 52nd most prevalent) isolated from the uteri of healthy and metritic dairy cows at 0, 2, and 6 ± 2 days post parturition (DPP).

| Species                               | All  | Healthy (%) |       |         | Metritis (%) |       |         |
|---------------------------------------|------|-------------|-------|---------|--------------|-------|---------|
|                                       |      | 0 DPP       | 2 DPP | 6±2 DPP | 0 DPP        | 2 DPP | 6±2 DPP |
| <i>Fusobacterium necrophorum</i>      | 14.7 | 6.1         | 14.8  | 15.8    | 9.5          | 18.1  | 20.2    |
| <i>Coxiella burnetii</i>              | 8.8  | 28.3        | 0.1   | 0.01    | 32.2         | 0.8   | 0.01    |
| <i>Porphyromonas levii</i>            | 8.4  | 12.7        | 5.9   | 9.4     | 8.5          | 3.5   | 11.4    |
| <i>Bacteroides heparinolyticus</i>    | 7.6  | 4.0         | 1.8   | 7.0     | 5.4          | 7.9   | 16.8    |
| <i>Ureaplasma diversum</i>            | 6.0  | 0.4         | 20.9  | 7.2     | 0.1          | 7.0   | 0.1     |
| <i>Sneathia sanguinegens</i>          | 5.4  | 0.5         | 9.4   | 10.6    | 0.7          | 8.3   | 1.5     |
| <i>Bacteroides pyogenes</i>           | 4.9  | 3.6         | 2.0   | 4.0     | 7.4          | 2.3   | 10.0    |
| <i>Mycoplasma californicum</i>        | 4.1  | 0.6         | 5.4   | 1.3     | 0.2          | 13.7  | 1.5     |
| <i>Gallibacterium melopsittaci</i>    | 3.9  | 0.5         | 14.6  | 1.7     | 0.3          | 5.4   | 0.9     |
| <i>Helcococcus ovis</i>               | 3.3  | 0.9         | 1.2   | 4.6     | 2.0          | 1.3   | 8.6     |
| <i>Fusobacterium gonidiaformans</i>   | 2.5  | 0.8         | 2.1   | 1.7     | 1.2          | 4.2   | 4.4     |
| <i>Bacteroides denticanum</i>         | 1.6  | 1.9         | 0.9   | 1.4     | 2.8          | 0.8   | 2.1     |
| <i>Serratia entomophila</i>           | 1.3  | 0.5         | 0.07  | 3.3     | 0.04         | 3.2   | 0.02    |
| <i>Streptococcus suis</i>             | 1.0  | 0.1         | 2.7   | 0.1     | 0.04         | 2.9   | 0.05    |
| <i>Escherichia albertii</i>           | 1.0  | 0.3         | 0.04  | 2.7     | 0.02         | 2.4   | 0.01    |
| <i>Filifactor villosus</i>            | 1.0  | 1.0         | 0.5   | 0.9     | 0.8          | 0.9   | 1.7     |
| <i>Streptococcus uberis</i>           | 0.9  | 0.4         | 0.7   | 1.7     | 0.3          | 1.7   | 0.4     |
| <i>Candidatus Blochmannia rufipes</i> | 0.9  | 1.8         | 1.0   | 0.8     | 1.0          | 0.6   | 0.4     |
| <i>Streptococcus pluranimalium</i>    | 0.9  | 0.05        | 0.5   | 0.1     | 4.9          | 0.2   | 0.001   |
| <i>Porphyromonas cansulci</i>         | 0.8  | 0.06        | 0.02  | 0.02    | 0.2          | 0.05  | 4.0     |
| <i>Porphyromonas asaccharolytica</i>  | 0.7  | 0.08        | 0.03  | 0.5     | 0.4          | 0.5   | 2.6     |
| <i>Porphyromonas canis</i>            | 0.7  | 1.1         | 0.4   | 0.5     | 1.1          | 0.5   | 1.1     |
| <i>Escherichia coli</i>               | 0.7  | 0.2         | 0.03  | 2.0     | 0.01         | 1.6   | 0.01    |
| <i>Clostridium alkalicellulosi</i>    | 0.6  | 1.2         | 0.6   | 0.5     | 1.0          | 0.3   | 0.06    |
| <i>Prevotella albensis</i>            | 0.6  | 0.6         | 0.3   | 0.6     | 0.7          | 0.6   | 0.5     |
| <i>Peptoniphilus coxii</i>            | 0.5  | 0.8         | 0.4   | 0.4     | 0.4          | 0.5   | 0.9     |
| <i>Caloramator mitchellensis</i>      | 0.5  | 1.0         | 0.3   | 0.8     | 0.8          | 0.3   | 0.1     |
| <i>Peptoniphilus indolicus</i>        | 0.5  | 0.8         | 0.3   | 1.0     | 0.4          | 0.1   | 0.3     |
| <i>Mycoplasma canadense</i>           | 0.5  | 0.01        | 0.04  | 1.7     | 0.4          | 0.2   | 0.2     |
| <i>Oscillospira spp.</i>              | 0.4  | 1.0         | 0.4   | 0.3     | 0.8          | 0.2   | 0.01    |
| <i>Trueperella pyogenes</i>           | 0.2  | 0.02        | 0.01  | 0.1     | 0.1          | 0.1   | 0.6     |
